# Supplementary material for: Disease-associated mutations in human BICD2 hyperactivate motility of dynein–dynactin
Source: PubMed Central journal article supplement — J Cell Biol. 2017 Oct 2;216(10):3051–60. doi: 10.1083/jcb.201703201 (PMC5626548; doi:10.1083/jcb.201703201), 2017-10-02
Supplement: JCB_201703201_sm.pdf [file JCB_201703201_sm.pdf]

Huynh and Vale, <https://doi.org/10.1083/jcb.201703201>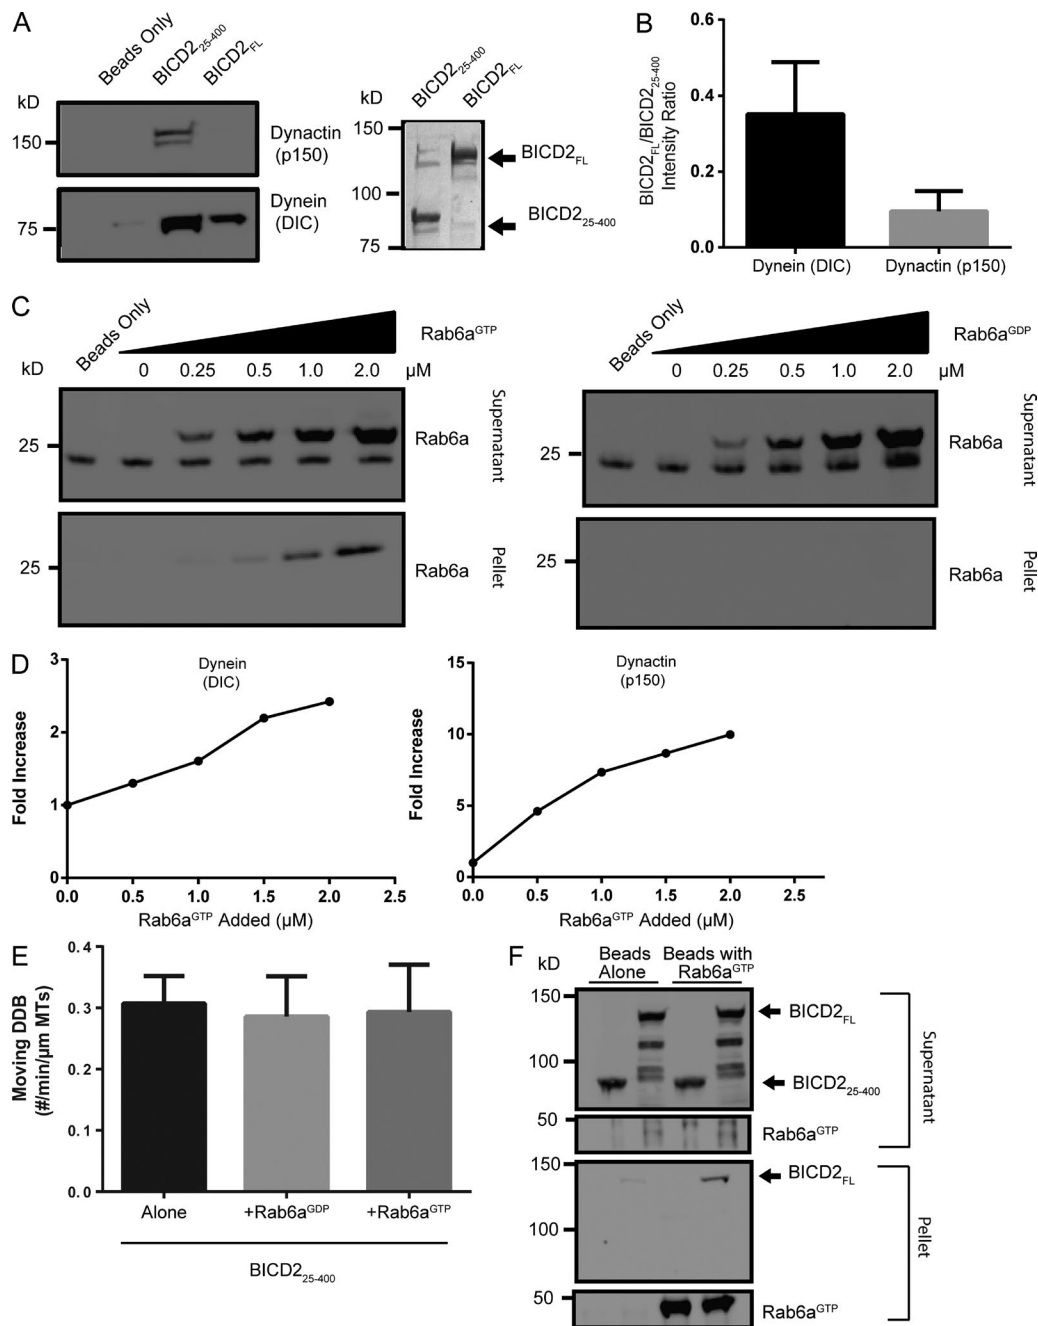

Figure S1. **BICD2<sub>25-400</sub> recruits more dynein compared with full-length.** (A) A comparison of the amounts of dynein and dynactin pulled down from porcine brain lysate between BICD2<sub>25-400</sub> and BICD2<sub>FL</sub>. (B) Quantification of the pull-down; mean and SD from  $n = 3$  independent experiments. (C) The supernatant and pellet fraction of the pull-downs from Fig. 1 B showing that Rab6a<sup>GTP</sup> but not Rab6a<sup>GDP</sup> binds to the BICD2 on beads. (D) Quantification of the Western blot shown in Fig. 1 B for the case of Rab6a<sup>GTP</sup> addition. Values are normalized to the lane in which no Rab6a is added. (E) Quantification of number of moving motors per micrometer of microtubule of BICD2<sub>25-400</sub> with no Rab6a added, Rab6a<sup>GDP</sup> added, or Rab6a<sup>GTP</sup> added; mean and SEM from  $n = 3$  independent experiments (each experiment measuring a minimum of 30 microtubules). (F) GST-Rab6aGTP pull-down of either BICD2<sub>25-400</sub> or BICD2<sub>FL</sub>.

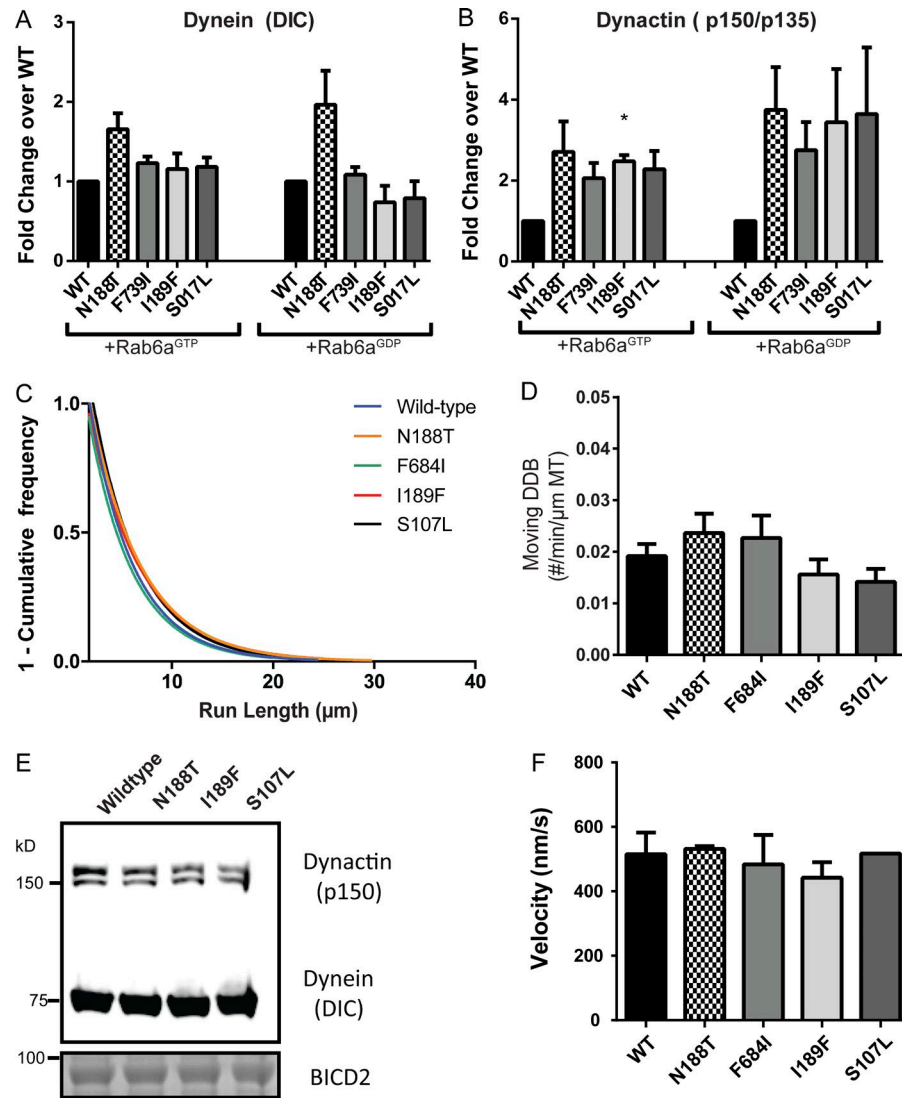

Figure S2. **N-terminal mutant constructs of BICD2 are comparable with WT.** (A and B) Quantification of the Western blots for Rab6a<sup>GTP</sup> and Rab6a<sup>GDP</sup> pull-downs from Fig. 2; mean and SEM from  $n = 3$  independent experiments. For A, GTP addition mean and SEM are as follows: N188T:  $1.66 \pm 0.20$ ,  $P = 0.082$ ; F739I:  $1.23 \pm 0.082$ ,  $P = 0.11$ ; I189F:  $1.16 \pm 0.20$ ,  $P = 0.51$ ; and S107L:  $1.18 \pm 0.12$ ,  $P = 0.26$ . GDP addition mean and SEM are as follows: N188T:  $1.96 \pm 0.42$ ,  $P = 0.15$ ; F739I:  $1.08 \pm 0.097$ ,  $P = 0.47$ ; I189F:  $0.738 \pm 0.21$ ,  $P = 0.34$ ; and S107L:  $0.792 \pm 0.21$ ,  $P = 0.43$ . For (B), GTP addition mean and SEM are as follows: N188T:  $2.71 \pm 0.75$ ,  $P = 0.15$ ; F739I:  $2.06 \pm 0.375$ ,  $P = 0.11$ ; I189F:  $2.48 \pm 0.15$ ,  $P = 0.011$ ; and S107L:  $2.28 \pm 0.45$ ,  $P = 0.10$ . GDP addition mean and SEM are as follows: N188T:  $3.75 \pm 1.06$ ,  $P = 0.152$ ; F739I:  $2.75 \pm 0.69$ ,  $P = 0.13$ ; I189F:  $3.44 \pm 1.3$ ,  $P = 0.20$ ; and S107L:  $3.65 \pm 1.6$ ,  $P = 0.25$ . (C) Processivity data in the form of a one-cumulative frequency histogram for one replicate, comparing different full-length BICD2 constructs. (D) The motility assay for DDB + Rab6a<sup>GDP</sup> is also shown; mean and SEM from  $n = 3$  independent experiments. (E) A comparison of BICD2<sub>25-400</sub> for WT and appropriate mutant constructs in the porcine brain lysate pull-down assay. Shown are the Western blots of the pellet fractions for p150 and DIC and a Coomassie staining for BICD2. (F) Velocity measurements of liposomes shown in Fig. 4 D; mean and SEM from  $n = 3$  independent experiments. Each experiment measured  $>100$  liposomes. The error bar for S107L is too small to appear on the graph.

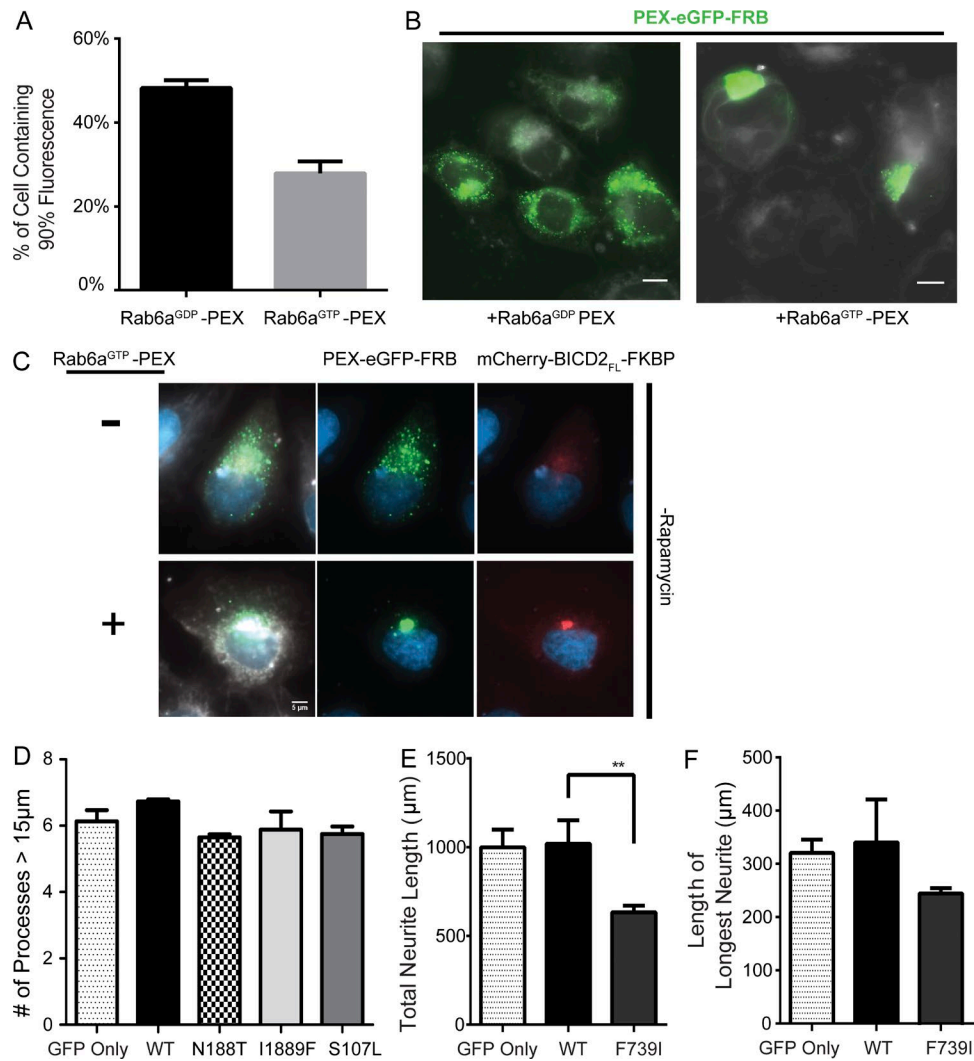

Figure S3. **Peroxisome-localized Rab6a<sup>GTP</sup> is sufficient for clustering in cells.** (A) A comparison of peroxisome clustering when either the GDP or GTP of Rab6a is fused with the PEX sequence; mean and SEM from  $n = 2$  independent experiments. Each experiment measured at least 30 cells. (B) Representative images of peroxisomes from A. The green color reflects PEX-eGFP-FRB, whereas the white is from a membrane dye, CellMask. Bar, 10  $\mu\text{m}$ . (C) Example of BICD2<sub>FL</sub> localizing to the peroxisomes even in the absence of rapamycin. In the top row, cells were transfected with PEX-eGFP-FRB and mCherry-BICD2<sub>FL</sub>. In the bottom row, the cells were additionally transfected with Rab6a<sup>GTP</sup>-PEX as well. (D) Quantification of total number of processes (>15  $\mu\text{m}$  long) emanating from the cell body of the neurons from Fig. 5 A; mean and SD from  $n = 3$  independent experiments. (E) Total neurite length after 3 d of overexpression of BICD2<sub>FL</sub> constructs; mean and SD from  $n = 3$  independent experiments (each experiment measuring 10–15 neurons for each construct); \*\*,  $P \leq 0.01$ . (F) Axon length after 3 d of overexpression of BICD2<sub>FL</sub> constructs; mean and SD from  $n = 3$  independent experiments (each experiment measuring 10–15 neurons for each construct).

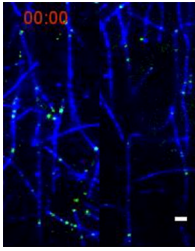

Video 1. **Comparison of BICD2<sub>25-400</sub> versus BICD2<sub>FL</sub> DDB.** Video shows motility of either BICD2<sub>25-400</sub> (left) or BICD2<sub>FL</sub> (right) DDB complexes (green) on microtubules (blue). Bar, 2  $\mu$ m. See Fig. 1 C for details.

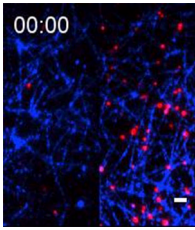

Video 2. **Comparison of Rab6<sup>GDP</sup> and Rab6<sup>GTP</sup> liposome motility.** Video shows a comparison of Rab6<sup>GDP</sup> (left) versus Rab6<sup>GTP</sup> (right) liposomes (red) when incubated together with DDB<sub>FL</sub>. Microtubules are shown in blue. Bar, 2  $\mu$ m.
